# Supplementary material for: An azido-bridged [FeII4] grid-like molecule showing spin crossover behaviour
Source: Royal Society of Chemistry journal article supplement (doi:10.1039/d1dt01908b), 2021-01-01
Supplement: d1dt01908b1.pdf [file d1dt01908b1.pdf]

*Supporting Information*

## **An azido-bridged [Fe<sup>II</sup><sub>4</sub>] grid-like molecule showing spin crossover behaviour**

Zhilin Guo,<sup>a, b</sup> Maolin You,<sup>a, c</sup> Yi-Fei Deng,<sup>a</sup> Qiang Liu,<sup>d</sup> Yin-Shan Meng,<sup>d</sup> Zoe Pikramenou,<sup>\*b</sup> and Yuan-Zhu Zhang<sup>\*a</sup>

<sup>a</sup> Department of Chemistry, Southern University of Science and Technology, Shenzhen, 518055, P. R. China.

<sup>b</sup> School of Chemistry, The University of Birmingham, Edgbaston B15 2TT, United Kingdom.

<sup>c</sup> Department of Chemistry, National University of Singapore, Science Drive 3, Singapore 117543

<sup>d</sup> State Key Laboratory of Fine Chemicals, Dalian University of Technology, 2 Linggong Rd, Dalian 116024, P. R. China

Email: z.pikramenou@bham.ac.uk; zhangyz@sustech.edu.cn

**Crystallography.** X-ray data for **1** and **2** were collected on a Bruker D8 VENTURE diffractometer with graphite monochromated Mo K $\alpha$  ( $\lambda = 0.71073 \text{ \AA}$ ) and Cu K $\alpha$  ( $\lambda = 1.54178 \text{ \AA}$ ) radiation, respectively. Lorentz/polarization corrections were applied during data reduction and the structures were solved with the SHELXT solution program using Intrinsic Phasing.<sup>[1]</sup> Refinements were performed by full-matrix least squares minimization (SHELXL) on  $F^2$ .<sup>[2]</sup> Anisotropic thermal parameters were used for the non-hydrogen atoms. Hydrogen atoms were added at calculated positions and refined using a riding model. Weighted R factors (wR) and the goodness-of-fit (S) values are based on  $F^2$ ; conventional R factors (R) are based on F, with F set to zero for negative  $F^2$ . Since the solvent molecules in **1** could not be completely modelled due to the disorder, a part of Q peaks were subtracted by the SQUEEZE program implemented in Olex2. As a result, 272.6 electrons were found in a total solvent accessible volume of  $1035.3 \text{ \AA}^3$  for **1** per unit cell. Combined with the definition in the residual density map, we attribute this to the presence of four CHCl<sub>3</sub> and two CH<sub>3</sub>OH per unit cell which account for 268 electrons that is consistent with the SQUEEZE calculations.

## References

- [1] Sheldrick, G.M. *Acta Cryst.* **2015**, *A71*, 3-8.
- [2] Sheldrick, G.M. *Acta Cryst.* **2015**, *C71*, 3-8.

**Table S1.** Selected Crystallographic data of **1** and **2**.

| Compound                                    | <b>1</b>                                                                                                         |                                                      | <b>2</b>                                                                         |                                                      |                                                      |
|---------------------------------------------|------------------------------------------------------------------------------------------------------------------|------------------------------------------------------|----------------------------------------------------------------------------------|------------------------------------------------------|------------------------------------------------------|
| Empirical formula                           | C <sub>168</sub> H <sub>173</sub> B <sub>4</sub> Cl <sub>15</sub> Fe <sub>4</sub> N <sub>40</sub> O <sub>3</sub> |                                                      | C <sub>156</sub> H <sub>126</sub> B <sub>4</sub> Fe <sub>4</sub> N <sub>30</sub> |                                                      |                                                      |
| Formula weight                              | 3598.85                                                                                                          |                                                      | 2687.50                                                                          |                                                      |                                                      |
| Radiation                                   | MoK $\alpha$ ( $\lambda$ = 0.71073)                                                                              |                                                      | CuK $\alpha$ ( $\lambda$ = 1.54178)                                              |                                                      |                                                      |
| Crystal size/mm <sup>3</sup>                | 0.30 $\times$ 0.25 $\times$ 0.15                                                                                 |                                                      | 0.25 $\times$ 0.25 $\times$ 0.20                                                 |                                                      |                                                      |
| Crystal system                              | Triclinic                                                                                                        |                                                      | Tetragonal                                                                       |                                                      |                                                      |
| Space group                                 | P-1                                                                                                              |                                                      | I4 <sub>1</sub> /a                                                               |                                                      |                                                      |
| Temp.                                       | 100 K                                                                                                            | 100 K                                                | 150 K                                                                            | 200 K                                                | 300 K                                                |
| CCDC deposit                                | 2015661                                                                                                          | 2015655                                              | 2078512                                                                          | 2015657                                              | 2015660                                              |
| a/Å                                         | 18.0455(8)                                                                                                       | 17.2401(3)                                           | 17.2652(8)                                                                       | 17.3036(3)                                           | 17.4466(3)                                           |
| b/Å                                         | 19.1164(8)                                                                                                       | 17.2401(3)                                           | 17.2652(8)                                                                       | 17.3036(3)                                           | 17.4466(3)                                           |
| c/Å                                         | 28.9018(12)                                                                                                      | 42.898(1)                                            | 43.062(3)                                                                        | 43.1803(10)                                          | 43.6969(13)                                          |
| $\alpha$ /°                                 | 89.217(2)                                                                                                        | 90                                                   | 90                                                                               | 90                                                   | 90                                                   |
| $\beta$ /°                                  | 72.662(2)                                                                                                        | 90                                                   | 90                                                                               | 90                                                   | 90                                                   |
| $\gamma$ /°                                 | 62.820(2)                                                                                                        | 90                                                   | 90                                                                               | 90                                                   | 90                                                   |
| Volume/Å <sup>3</sup>                       | 8377.7(6)                                                                                                        | 12750.2(5)                                           | 12836.1(15)                                                                      | 12928.8(5)                                           | 13300.6(6)                                           |
| Z                                           | 2                                                                                                                | 4                                                    | 4                                                                                | 4                                                    | 4                                                    |
| $\rho_{\text{calc}}$ /cm <sup>3</sup>       | 1.212                                                                                                            | 1.400                                                | 1.391                                                                            | 1.381                                                | 1.342                                                |
| $\mu$ /mm <sup>-1</sup>                     | 0.449                                                                                                            | 4.124                                                | 4.097                                                                            | 4.067                                                | 3.954                                                |
| F(000)                                      | 3192.0                                                                                                           | 5584.0                                               | 5584.0                                                                           | 5584.0                                               | 5584.0                                               |
| 2 $\theta$ range /°                         | 2.628 to 55.018                                                                                                  | 8.03 to 136.6                                        | 5.51 to 130.3                                                                    | 10.2 to 136.8                                        | 7.91 to 130.3                                        |
| Reflections collected/unique                | 200308/37755                                                                                                     | 37412/5831                                           | 26305/5831                                                                       | 26305/5831                                           | 26215/5667                                           |
| R <sub>int</sub>                            | 0.0545                                                                                                           | 0.0565                                               | 0.0794                                                                           | 0.0490                                               | 0.0622                                               |
| R <sub>sigma</sub>                          | 0.0473                                                                                                           | 0.0307                                               | 0.0739                                                                           | 0.0325                                               | 0.0590                                               |
| Goodness-of-fit on F <sup>2</sup>           | 1.030                                                                                                            | 1.068                                                | 0.996                                                                            | 1.057                                                | 1.024                                                |
| Final R indexes [I > 2 $\sigma$ (I)]        | R <sub>1</sub> = 0.0493,<br>wR <sub>2</sub> = 0.1181                                                             | R <sub>1</sub> = 0.0369,<br>wR <sub>2</sub> = 0.0965 | R <sub>1</sub> = 0.0660,<br>wR <sub>2</sub> = 0.1707                             | R <sub>1</sub> = 0.0335,<br>wR <sub>2</sub> = 0.0904 | R <sub>1</sub> = 0.0479,<br>wR <sub>2</sub> = 0.1238 |
| Final R indexes [all data]                  | R <sub>1</sub> = 0.0759,<br>wR <sub>2</sub> = 0.1322                                                             | R <sub>1</sub> = 0.0459,<br>wR <sub>2</sub> = 0.1011 | R <sub>1</sub> = 0.1027,<br>wR <sub>2</sub> = 0.1994                             | R <sub>1</sub> = 0.0466,<br>wR <sub>2</sub> = 0.0958 | R <sub>1</sub> = 0.0748,<br>wR <sub>2</sub> = 0.1408 |
| Largest diff. peak/hole / e Å <sup>-3</sup> | 0.59/-0.98                                                                                                       | 0.70/-0.23                                           | 0.54/-0.31                                                                       | 0.34/-0.27                                           | 0.28/-0.14                                           |

**Table S2.** Selected bond distance [ $\text{\AA}$ ] and angles [deg] of **1** at 100 K.

|         |          |             |           |             |           |
|---------|----------|-------------|-----------|-------------|-----------|
| Fe1-N1  | 2.159(2) | Fe4-N16     | 2.183(2)  | N4-Fe2-N9   | 175.68(7) |
| Fe1-N3  | 2.209(1) | Fe4-N18     | 2.179(2)  | N4-Fe2-N7   | 109.20(7) |
| Fe1-N19 | 2.154(1) | Fe4-N22     | 2.196(1)  | N4-Fe2-N34  | 93.30(7)  |
| Fe1-N21 | 2.220(1) | Fe4-N24     | 2.160(2)  | N4-Fe2-N25  | 84.63(7)  |
| Fe1-N25 | 2.084(1) | Fe4-N28     | 2.103(1)  | N4-Fe2-N6   | 72.48(7)  |
| Fe1-N28 | 2.123(1) | Fe4-N31     | 2.121(2)  | N15-Fe3-N10 | 172.34(7) |
| Fe2-N4  | 2.223(2) | N3-Fe1-N21  | 175.14(7) | N15-Fe3-N12 | 108.78(7) |
| Fe2-N6  | 2.151(2) | N3-Fe1-N19  | 111.02(7) | N15-Fe3-N34 | 93.04(7)  |
| Fe2-N7  | 2.159(2) | N3-Fe1-N28  | 91.64(7)  | N15-Fe3-N31 | 85.95(7)  |
| Fe2-N9  | 2.222(1) | N3-Fe1-N25  | 86.10(7)  | N15-Fe3-N13 | 72.48(7)  |
| Fe2-N25 | 2.125(1) | N3-Fe1-N1   | 72.37(7)  | Fe1-N25-Fe2 | 120.86(9) |
| Fe2-N34 | 2.079(2) | N16-Fe4-N22 | 173.87(7) | Fe1-N28-Fe4 | 118.79(9) |
| Fe3-N10 | 2.212(1) | N16-Fe4-N24 | 113.55(7) | Fe3-N34-Fe2 | 120.40(9) |
| Fe3-N12 | 2.157(2) | N16-Fe4-N31 | 86.97(7)  | Fe3-N31-Fe4 | 118.89(9) |
| Fe3-N13 | 2.179(2) | N16-Fe4-N28 | 87.41(7)  |             |           |
| Fe3-N15 | 2.221(2) | N16-Fe4-N18 | 72.64(7)  |             |           |
| Fe3-N31 | 2.120(1) |             |           |             |           |
| Fe3-N34 | 2.079(2) |             |           |             |           |

**Table S3.** Selected bond distance [ $\text{\AA}$ ] and angles [deg] of **2** at different temperatures.

|            | 100 K     | 150 K      | 200 K     | 300 K      |
|------------|-----------|------------|-----------|------------|
| Fe1-N1     | 1.976(0)  | 1.999(4)   | 1.985(8)  | 2.150(3)   |
| Fe1-N2     | 1.920(9)  | 1.940(4)   | 1.938(7)  | 2.141(2)   |
| Fe1-N3C    | 1.930(6)  | 1.938(4)   | 1.945(8)  | 2.140(3)   |
| Fe1-N4C    | 1.989(8)  | 1.986(4)   | 2.003(4)  | 2.179(3)   |
| Fe1-N5     | 2.005(7)  | 2.002(3)   | 2.003(4)  | 2.069(3)   |
| Fe1-N5C    | 2.011(8)  | 2.008(3)   | 2.017(4)  | 2.080(3)   |
| N1-Fe1-N2  | 80.96(6)  | 80.60(15)  | 80.60(6)  | 74.84(10)  |
| N1-Fe1-N3C | 99.47(6)  | 98.04(15)  | 99.63(6)  | 103.44(9)  |
| N1-Fe1-N4C | 83.66(6)  | 83.35(14)  | 83.36(6)  | 81.89(10)  |
| N1-Fe1-N5  | 166.43(6) | 165.09(15) | 165.88(7) | 158.05(10) |
| N1-Fe1-N5C | 93.42(6)  | 94.47(15)  | 93.49(6)  | 94.13(10)  |
| N5-Fe1-N5C | 91.80(9)  | 91.9(2)    | 92.24(9)  | 98.66(14)  |

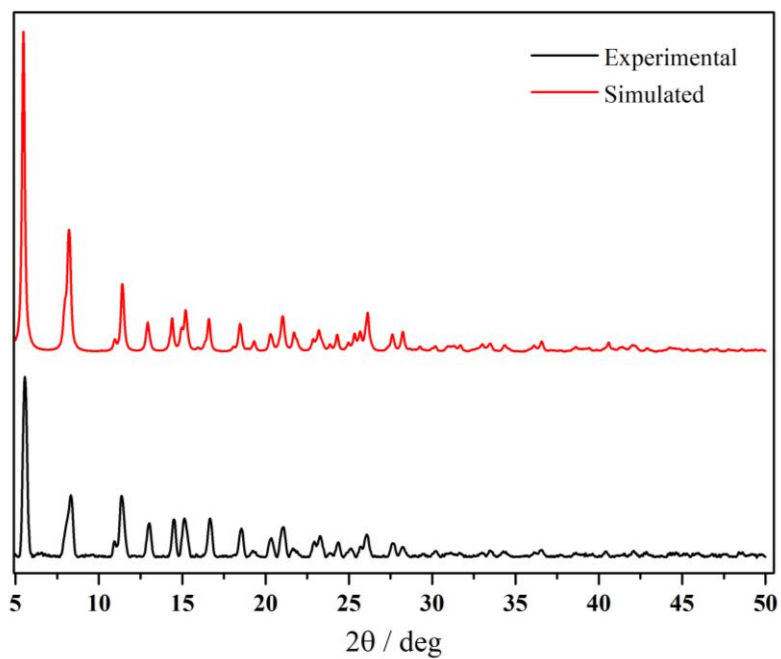

**Fig. S1.** The experimental and simulated PXR D patterns of **2** at 300 K.

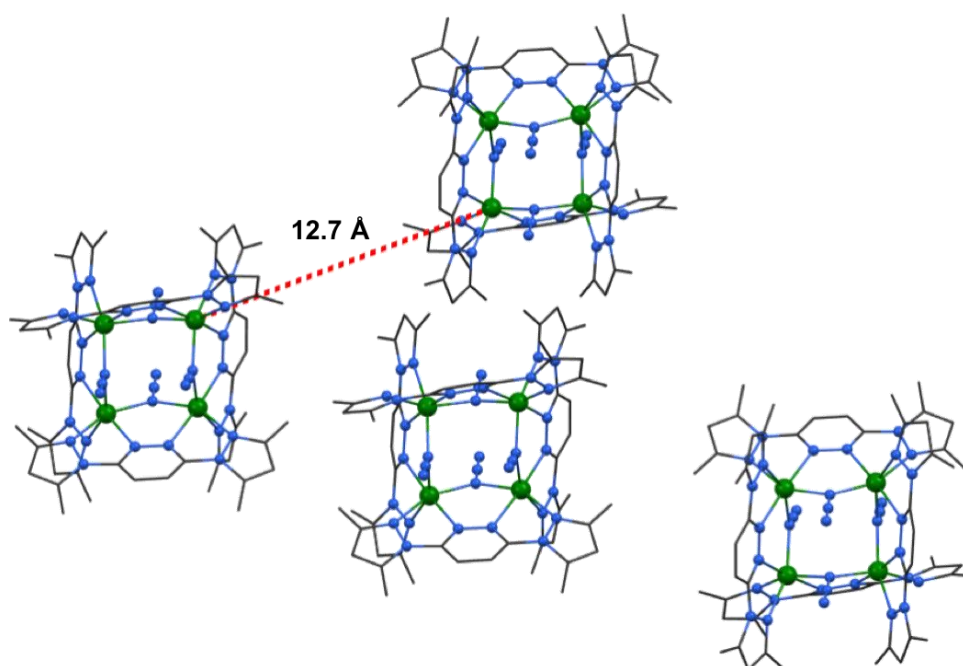

**Fig. S2.** The packing diagram of **1**. Hydrogen atoms, counter ions and lattice solvents are omitted for clarity.

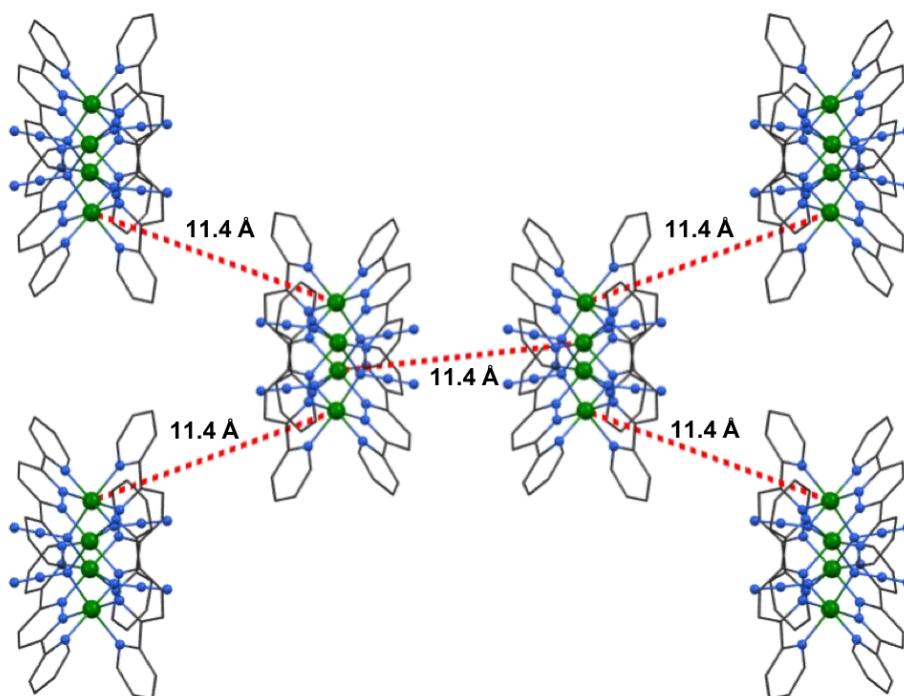

**Fig. S3.** The packing diagram of **2**. Hydrogen atoms, counter ions and lattice solvents are omitted for clarity.

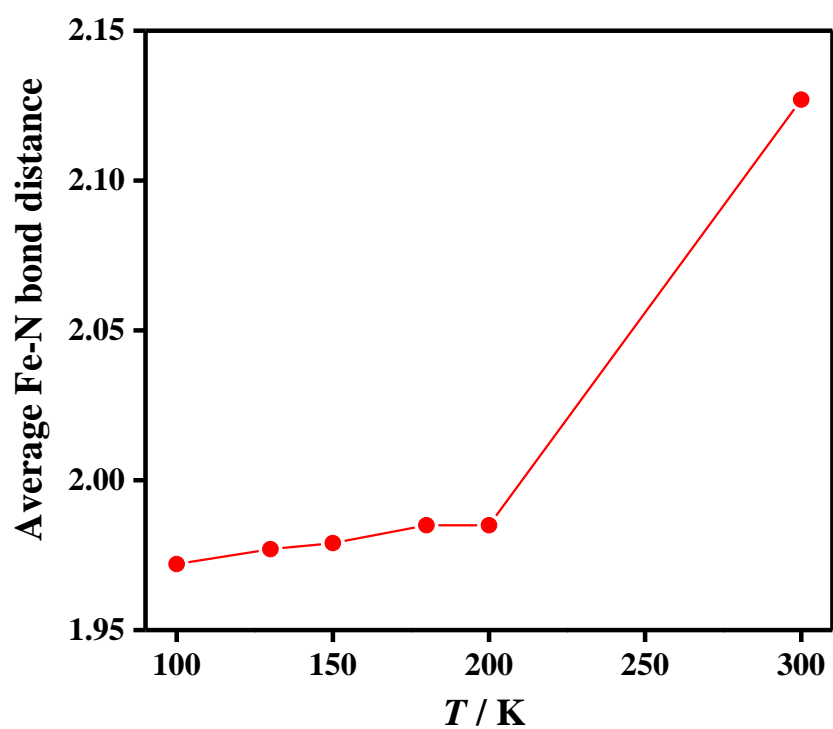

**Fig. S4.** Temperature dependence of average Fe-N bond distances for complex **2**. Solid lines are guided to the eye.

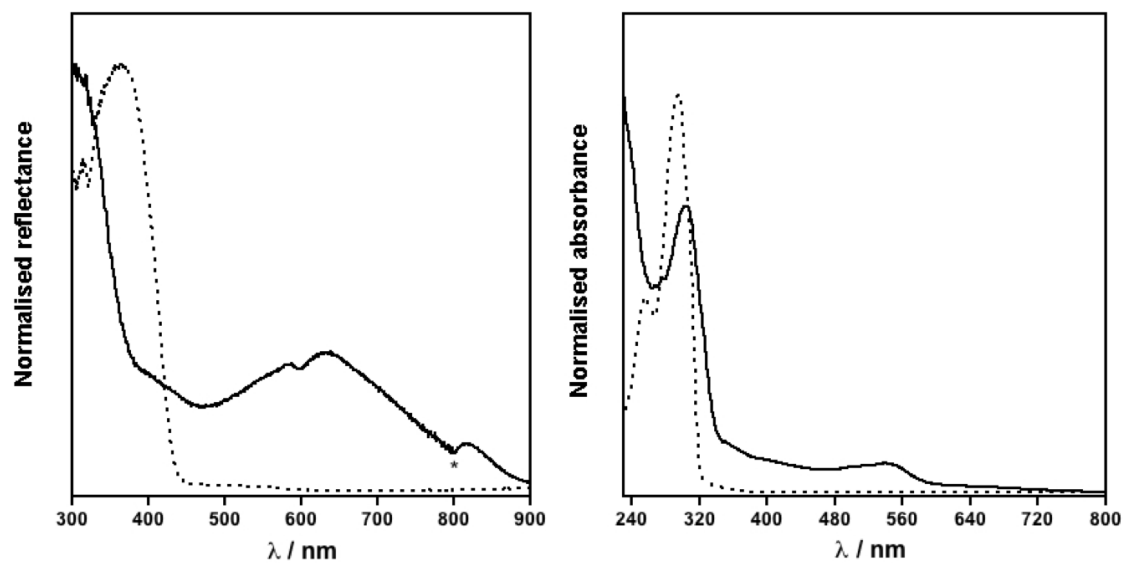

**Fig. S5.** Solid state (left) and acetonitrile solution (right) UV-vis spectra of **2** (solid line) and pydz ligand (dashed line) at room temperature (\* is an artifact due to lamp change at 800 nm).

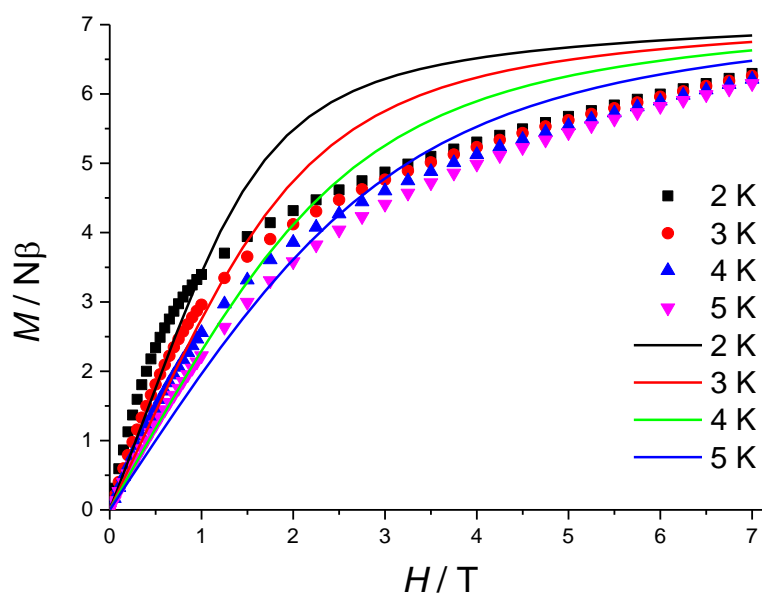

**Fig. S6.**  $M$  vs  $H$  data for **1** at 2-5 K. The solid lines represent the simulations using the spin Hamiltonian parameters from the  $\chi T$  fit.

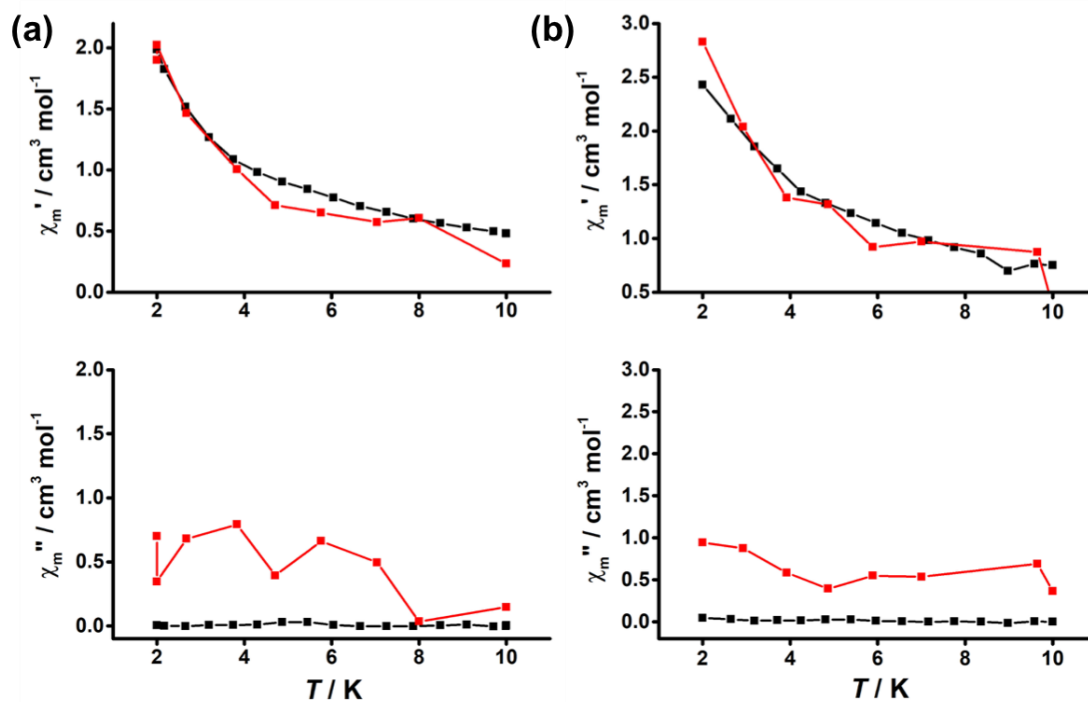

**Fig. S7.** AC magnetic susceptibility measurement of **1** under zero (a) and 1000 Oe (b) applied dc field.

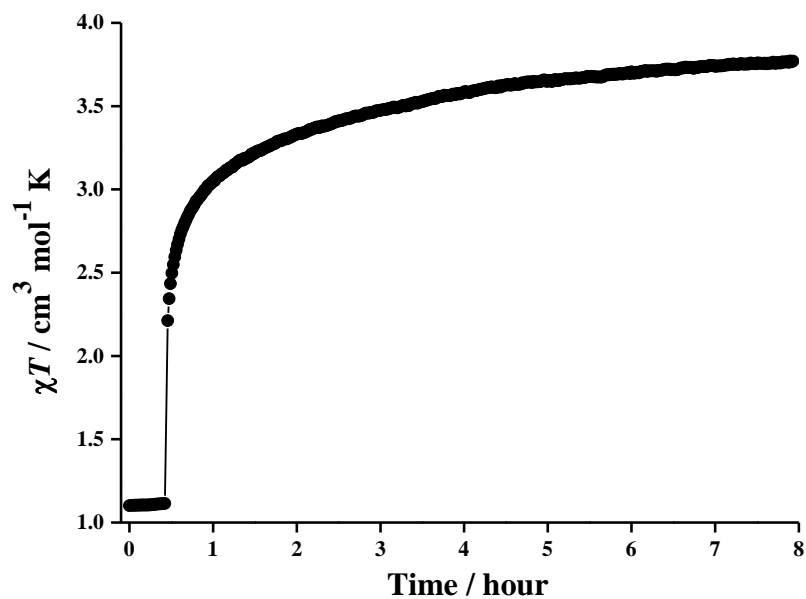

**Fig. S8.** Time evolution of the  $\chi T$  products of **2** at 10 kOe under light irradiation (808 nm, 10 mW) at 10 K.
